# Supplementary material
Source: HighWire-hosted journal article supplement (https://www.cmajopen.ca/highwire/filestream/80943/field_highwire_adjunct_files/1/open-2016-0057-original-submission.pdf)
Supplement: open-2016-0057-original-submission.pdf [file open-2016-0057-original-submission.pdf]

**Title:**

Cost evaluation of out-of-country care for patients with eating disorders in Ontario: a population-based study

**Authors:**

Claire de Oliveira, MA PhD

Centre for Addiction and Mental Health; Institute for Health Policy, Management and Evaluation, University of Toronto; Institute for Clinical Evaluative Sciences

Erin M. Macdonald, MSc

Institute for Clinical Evaluative Sciences

Diane Green, BSc

Institute for Clinical Evaluative Sciences

Patricia Colton, MD MSc

Toronto General Hospital, University Health Network; Department of Psychiatry, University of Toronto

Marion Olmsted, PhD

Toronto General Hospital, University Health Network; Department of Psychiatry, University of Toronto

1  
2  
3 Susan Bondy, PhD  
4

5 Dalla Lana School of Public Health, University of Toronto; ICES  
6  
7  
8  
9

10 Paul Kurdyak, MD PhD  
11

12 Centre for Addiction and Mental Health; Department of Psychiatry and Institute for Health  
13 Policy, Management and Evaluation, University of Toronto; Institute for Clinical Evaluative  
14 Sciences  
15  
16  
17  
18  
19

20  
21  
22 **Correspondence to:**  
23

24 Claire de Oliveira  
25

26 [claire.deoliveira@camh.ca](mailto:claire.deoliveira@camh.ca)  
27  
28  
29  
30

31  
32 **Funding:**  
33

34 This study was supported by the Institute for Clinical Evaluative Sciences (ICES), which is  
35 funded by an annual grant from the Ontario Ministry of Health and Long-Term Care  
36 (MOHLTC).  
37  
38  
39  
40  
41  
42

43  
44 **Competing interests:**  
45

46 None declared.  
47  
48  
49

50  
51 **Disclaimer:**  
52

53 The opinions, results, and conclusions reported in this paper are those of the authors and are  
54 independent from the funding sources. No endorsement by ICES or the Ontario MOHLTC is  
55  
56  
57  
58  
59  
60

1  
2  
3 intended or should be inferred. Parts of this material are based on data and information compiled  
4  
5 and provided by the Canadian Institute for Health Information (CIHI). However, the analyses,  
6  
7 conclusions, opinions, and statements expressed herein are those of the authors, and not  
8  
9 necessarily those of CIHI.  
10  
11  
12  
13  
14  
15  
16  
17  
18  
19  
20  
21  
22  
23  
24  
25  
26  
27  
28  
29  
30  
31  
32  
33  
34  
35  
36  
37  
38  
39  
40  
41  
42  
43  
44  
45  
46  
47  
48  
49  
50  
51  
52  
53  
54  
55  
56  
57  
58  
59  
60

Confidential

## Abstract

**Background:** Eating disorders, specifically anorexia nervosa, bulimia nervosa and eating disorder not otherwise specified, represent a substantial burden to the health care system. To address this, the Ontario government made an investment in eating disorders treatment in 2007. ~~We sought~~Our goal was to estimate the economic burden of patients who received specialised out-of-country eating disorder care.

**Method:** We conducted a cost-of-illness study evaluating ~~all~~ health care costs among individuals in Ontario who received specialised out-of-country eating disorder care from 2003 to 2011, from the public third-party payer perspective. Using linked administrative ~~health-care~~ databases, we estimated net costs of eating disorders for two patient groups – patients who received specialised out-of-country and in-province inpatient care (n=160), and patients who received specialised out-of-country inpatient care only (n=126).

**Results:** Patients approved for specialised out-of-country eating disorder care were mostly young females from high-income, urban neighbourhoods. Total annual net costs varied ~~by~~ yearannually, and were higher for patients treated out-of-country and in province (\$11.0 million before 2007, \$6.5 million after) compared to those treated out-of-country alone (\$5.0 million before 2007, \$2.0 million after). The main cost drivers were out-of-country care and physician services.

**Interpretation:** Costs associated with eating disorder care ~~are large and~~ represent a substantial economic burden to the Ontario health care system. Given the high costs of out-of-country care, there may be opportunity to redirect these funds to increase capacity and expertise for eating disorder treatment within Ontario; this may potentially reduce patient and systems costs, improve patient access and continuity of care, and create new jobs in ~~the province~~Ontario.

## Background

Approximately 3% of women are affected by an eating disorder (ED) in their lifetime (1). These disorders are associated with high levels of comorbid psychopathology, such as mood and anxiety disorders, post-traumatic stress disorder, and substance use disorders (2). In addition, anorexia nervosa has the highest mortality rate of any psychiatric disorder (3). These consequences are reflected in high costs of care (2). Prior research suggests that age-adjusted treatment costs for anorexia nervosa and bulimia nervosa are comparable to those for schizophrenia (4). Other work has shown that eating disorders are associated with high direct and indirect health care costs (5). Yet, precise cost estimates are currently lacking.

Eating disorders represent a substantial economic burden to the Ontario health care system; ~~yet, precise cost estimates are currently lacking.~~ To address this burden, the Ontario government made an investment in eating disorders treatment within the province in 2007. In addition to funding treatment within the province, the Ontario Ministry of Health and Long-term Care spends funds to send patients to the United States to receive specialised eating disorder treatment for complex cases, which cannot be treated in-province due to lack of resources, or when wait times for in-province treatment are deemed unacceptably long. This care is specifically for patients with serious, treatment-interfering post-traumatic stress disorder or substance use disorders concurrent with an ED. Furthermore, some patients may receive additional specialised care in-province; this is typically based on the care protocol defined by the specialist.

1  
2  
3 To be eligible for out-of-country care, patients must be diagnosed with an eating disorder by a  
4 specialist at one of Ontario's funded inpatient programs for eating disorders. The specialist  
5 submits the application on behalf of the patient to the Ontario Out-of-Country Health Coverage  
6 Program, which makes decisions regarding coverage for medical and hospital services performed  
7 outside of Canada. This program reviews these applications, undertaking research and/or  
8 consults with experts as required, and decides whether applicants are approved; these decisions  
9 are largely based on disease severity.  
10  
11  
12  
13  
14  
15  
16  
17  
18  
19  
20

21  
22 It may be possible to reinvest funds spent on out-of-country eating disorder care to develop and  
23 augment programs within Ontario. This could potentially reduce overall costs, including out-of-  
24 pocket expenses, improve patients' experiences and create additional jobs in Ontario (6).  
25  
26  
27  
28

29 Currently there is no protocol for transitional or follow-up care upon a patient's return to  
30 Ontario. Instead, follow-up care is provided by the patient's current care provider. Given the  
31 high risk of relapse during this transition period, disjointed care in different jurisdictions may  
32 contribute to poorer patient outcomes and additional treatment costs, although these data have  
33 not been collected.  
34  
35  
36  
37  
38  
39  
40  
41  
42

43 The purpose of this study was to estimate the total costs of patients with an eating disorder who  
44 received *specialised out-of-country care*, from the perspective of the public third-party payer . A  
45 careful evaluation of these costs may be useful to determine whether developing further  
46 specialised in-province services is financially justified. These findings will have significant  
47 policy implications for the Ontario government and other jurisdictions with similar out-of-  
48 country programs, such as British Columbia.  
49  
50  
51  
52  
53  
54  
55  
56  
57  
58  
59  
60

## Method

### *Study design and setting*

We conducted a cost of illness study. Our patient cohort included all individuals with an eating disorder covered under the Ontario Health Insurance Plan (OHIP) who applied and received specialised out-of-country care from April 1 2000 to March 31 2012. This cohort was divided into two groups, according to whether patients received additional specialized in-province inpatient care or not. We matched each patient to a set of control subjects with no history of an eating disorder to estimate net costs.

During our analysis period, namely in 2007, the Ontario government made a significant investment in eating disorders treatment within the province, which led to a decrease in the number of out-of-country applications.

### *Data Sources*

Data on all applicants who received out-of-country care for eating disorders were obtained from the Ministry of Health and Long-term Care's out-of-country program database, which includes all records on out-of-country care. These data included information on the status of the application (approved, denied, cancelled, awaiting information, pending), name of the out-of-country provider, total amount billed and paid by the province, service start and end dates, and the condition for which care was provided (eating disorder, substance abuse, other psychiatric disorders). Further information on the out-of-country care program can be found elsewhere (7).

1  
2  
3 In addition, we used administrative health care databases available through the Institute for  
4 Clinical Evaluative Sciences in Toronto, Ontario, to obtain data on all health services  
5 provided within province and covered by the Ministry of Health and Long-term Care (only).  
6  
7 These databases have been validated and described in the literature (8), and have been used  
8 previously for costing analyses in Ontario (9-11). A full description of each database can be  
9 found in the Appendix. These databases were linked using unique encoded identifiers and  
10 analyzed at the Institute for Clinical Evaluative Sciences. This study was approved by the  
11 Research Ethics Board at Sunnybrook Health Sciences Centre, Toronto, Canada.  
12  
13  
14  
15  
16  
17  
18  
19  
20  
21  
22  
23

### 24 ***Patient Cohort***

25  
26 We included patients diagnosed with anorexia nervosa, bulimia nervosa and eating disorder not  
27 otherwise specified (International Classification of Diseases (ICD)-9 codes 307.1, 307.50,  
28 307.51; ICD-10 codes F50.0-F50.3, F50.8, F50.9; and Diagnostic and Statistical Manual of  
29 Mental Disorders, 4<sup>th</sup> edition codes 307.1, 307.50, 307.51). We excluded individuals diagnosed  
30 with Prader-Willi syndrome (ICD-9 759.81 code; no specific ICD-10 code was available), a rare  
31 genetic disorder associated with excessive eating and obesity; individuals who did not reside in  
32 Ontario at time of diagnosis; those who did not have a valid OHIP number during the analysis  
33 period; and patients with missing information on age and/or sex. We also excluded patients who  
34 first applied for out-of-country care outside the study period, those who were denied or cancelled  
35 out-of-country care, and patients with missing information on the out-of-country application  
36 status. Our final cohort included all patients who received specialised out-of-country eating  
37 disorder treatment (and thus similar disease severity). This cohort was further divided into two  
38 groups, differing only in terms of whether they received specialised in-province care or not.  
39  
40  
41  
42  
43  
44  
45  
46  
47  
48  
49  
50  
51  
52  
53  
54  
55  
56  
57  
58  
59  
60



## *Analysis*

### *Socio-demographic and clinical characteristics*

We compared both patient groups on socio-demographic characteristics, such as age, sex, neighbourhood income quintile (at the Census tract level) and urban/rural residence, and comorbidity, such as diabetes, asthma and hypertension, which were defined using validated algorithms (12-14).

### *Estimation of costs of care*

Costs for out-of-country care were available in the OHIP claims database (fee codes H700, H820, H830 and H850). Costs, in American dollars, were converted to Canadian dollars using monthly exchange rates, and adjusted to 2012 values.

To estimate direct costs for in-province care, we used a costing algorithm (8) available at the Institute for Clinical Evaluative Sciences. Complete cost data were not available for the entire analysis period, and therefore estimated from 2003 to 2011 only. These included costs of inpatient hospitalizations (psychiatric and non-psychiatric), emergency department visits, other ambulatory care, physician visits, lab tests, outpatient prescription drugs covered under the public provincial drug program, complex continuing care, long-term care, home care, rehabilitation and assistive devices (see Appendix). All costs were adjusted to 2012 Canadian dollars.

1  
2  
3 Standard costing methodology employed a bottom-up (micro-costing) approach to cost services  
4 at the individual level (8). This approach made use of individual episodes of care or utilization in  
5 the health system and attached prices (or costs or amounts paid by the Ministry of Health and  
6 Long-term Care) to each one. A top-down approach, which allocates corporate aggregate  
7 (institutional) costs to individual visits or to cases or episodes of care, was applied when  
8 individual unit costs were not available (for example, for institutional care settings) (8). Further  
9 details on the costing methodology can be found elsewhere (8).  
10  
11  
12  
13  
14  
15  
16  
17  
18  
19  
20

21  
22 Many cost-of-illness studies have been criticized for attributing all costs to a single disorder,  
23 despite most patients having other health problems that also require care (15). Therefore, we  
24 employed the ‘net cost’ method to obtain an estimate of the cost of an eating disorder. This  
25 method consists of matching patients who have an eating disorder to patients who do not  
26 (control subjects) on variables associated with resource use, and subtracting the costs incurred by  
27 the former from those incurred by the latter (16-18). Patients with an eating disorder were  
28 matched to control subjects on age, sex and neighbourhood income quintile on a 1:4 ratio, for a  
29 total of 1,144 control subjects. The net cost method was only applied to costs incurred in  
30 Ontario; out-of-country costs were over and above net costs.  
31  
32  
33  
34  
35  
36  
37  
38  
39  
40  
41  
42  
43  
44  
45

## 46 **Results**

47  
48 We started with all out-of-country applicants (n=1,854). We excluded those who did not meet  
49 our eating disorder care definition (n=1,295), those who first applied outside our study window  
50 (n=62), and those who were denied out-of-country care, whose care was cancelled or had  
51 missing information (n=211) (Figure 1). Patients who were approved care were younger than  
52  
53  
54  
55  
56  
57  
58  
59  
60

1  
2  
3 those denied care (median age of 18 versus 23, respectively), but similar on all other patient  
4 characteristics (results available upon request). This was also the case for those with cancelled  
5 care and missing information. Our final cohort included all patients who first applied and were  
6 approved for out-of-country care between fiscal years 2000 and 2012 (n=286), which was further  
7 divided into two patient groups – those who did not receive additional specialised in-province  
8 inpatient care during the study period (n=126), and those who did (n=160) .  
9  
10  
11  
12  
13  
14  
15  
16  
17  
18  
19

### 20 *Socio-demographic and clinical characteristics*

21  
22 Patient groups differed mostly in terms of age and sex, but were similar on all other socio-  
23 demographic and clinical characteristics (Table 1). There was a slightly higher proportion of  
24 female patients among those who received specialised out-of-country and in-province inpatient  
25 care (98% vs. 91%). Patients who received both specialised out-of-country and in-province  
26 inpatient care were roughly 4 years younger than those who received specialised out-of-country  
27 care only. Most patients were from high-income, urban neighbourhoods. Less than 7% had  
28 diabetes or hypertension; a quarter of patients had asthma.  
29  
30  
31  
32  
33  
34  
35  
36  
37  
38  
39  
40

### 41 *Estimation of costs*

42  
43 The number of funded out-of-country applications increased from 2000 to 2006, and decreased  
44 thereafter (Figure 2). Total annual net costs were estimated from 2003 to 2011; these varied  
45 accordingly with the number of funded applications approved each year. Overall, there was an  
46 inverted u-shape curve in costs over time for both patient groups (Figures 3a and b).  
47  
48  
49  
50  
51  
52  
53  
54  
55  
56  
57  
58  
59  
60

1  
2  
3 Total annual costs per year were approximately \$5 million before 2007 and \$2 million thereafter  
4  
5 for patients who received specialised out-of-country inpatient care only (Figure 3a), and \$11  
6  
7 million before 2007 and \$6.5 million after 2007 for patients who received both specialised out-  
8  
9 of-country and in-province inpatient care (Figure 3b).  
10  
11

12  
13  
14  
15 In-province costs for patients who receive specialised out-of-country inpatient care only were  
16  
17 just under \$3 million per year until 2007, and decreased to around \$1.5 million per year  
18  
19 thereafter (Figure 3a). Out-of-country costs for this group were slightly lower than in-province  
20  
21 costs and followed a similar temporal pattern (\$2.3 million before 2007, \$0.5 million after)  
22  
23 (Figure 3a).  
24  
25  
26  
27  
28

29 In-province costs were substantially higher for patients who received both specialised out-of-  
30  
31 country and in-province care – just under \$7 million annually until 2007 (except in 2003), and  
32  
33 about \$5 million per year afterwards (3) (Figure 3b). Out-of-country costs were slightly lower,  
34  
35 but followed a similar pattern (around \$4 million in the first years and about \$1.5 million in the  
36  
37 later years) (Figure 3b).  
38  
39  
40  
41  
42

43 On average, out-of-country and physician costs were the largest contributors to the overall cost  
44  
45 for both patient groups. Costs of inpatient hospitalizations were also important cost drivers,  
46  
47 mainly for patients who received specialised in-province care. Costs with other health services  
48  
49 represented a small percentage ( $\leq 5\%$ ) of the overall cost for all patients (not shown).  
50  
51  
52  
53  
54

## 55 Interpretation

56  
57  
58  
59  
60

1  
2  
3 Patients with eating disorders have high health care utilization and costs (5). The management  
4 of health care costs and avoidance of out-of-country care are a high priority for Ontario;  
5  
6 however, little is known about the costs of treating patients with eating disorders. We estimated  
7  
8 total *net* costs for two patient groups that were approved for and received specialised out-of-  
9  
10 country care. Most patients were young, female and from high-income, urban neighbourhoods.  
11  
12 Total net costs were higher for patients who received both specialised out-of-country and in-  
13  
14 province inpatient care, suggesting these patients are complex cases. The major contributors to  
15  
16 the overall cost were out-of-country care and physician services, and to a lesser degree, in-  
17  
18 province inpatient hospitalizations. Although we observed a decrease in costs in 2007, due to  
19  
20 significant changes in the out-of-country care program (19), the costs of this program remained a  
21  
22 relatively large component of the economic burden of eating disorders to the province.  
23  
24  
25  
26  
27  
28  
29  
30  
31

32 A comprehensive literature review identified only six studies worldwide on health services use  
33  
34 and costs among individuals with an eating disorder. Most studies were dated and results varied  
35  
36 greatly (5). In the UK, the direct health care system cost of anorexia nervosa was estimated at  
37  
38 £4.2 million in 1990 (20); in Germany, the cost was €65 million for anorexia nervosa and €10  
39  
40 million for bulimia nervosa in 1998 (21). In Australia health care costs of EDs were Aus\$22  
41  
42 million in 1993/1994 (22). Other cost studies that focused mostly on inpatient care reported  
43  
44 highly variable estimates. More recent work from the UK has shown that total treatment costs to  
45  
46 the National Health Service may vary between £3.9 billion and £ 4.6 billion (23). Despite high  
47  
48 health care utilization among these individuals, results in most studies were likely gross  
49  
50 underestimates of the full magnitude of the economic burden as only inpatient costs were  
51  
52 captured (21), or results were based on limited cost data (4). Furthermore, only one study  
53  
54  
55  
56  
57  
58  
59  
60

1  
2  
3 reported specific information on service use of eating disorder not otherwise specified (4), the  
4 most common diagnosis encountered in clinical practice (24). We did not find any studies that  
5 estimated net costs or that examined an out-of-country program; thus, our estimates are not  
6 directly comparable to previous work. Nonetheless, we found that our estimates were quite  
7 substantial even for a very small group of patients (n=286), with out-of-country costs  
8 representing a small proportion of the Ontario health care budget (0.005% in 2012) (25).  
9 Evidence suggests that average daily treatment costs in-province are lower than those out-of-  
10 country (\$918 versus \$1,285, respectively) (26).  
11  
12  
13  
14  
15  
16  
17  
18  
19  
20  
21  
22  
23  
24

25 Complete cost estimates for patients with eating disorders are required to determine cost-  
26 effective treatment options (5); yet, these are generally lacking in the literature (27). Few studies  
27 have examined the cost-effectiveness of eating disorder-related interventions (28). Thus, our cost  
28 estimates may be useful inputs for researchers undertaking economic evaluations. Furthermore,  
29 they may help inform policy discussions in Ontario and other jurisdictions with similar funded  
30 out-of-country care programs, such as British Columbia.  
31  
32  
33  
34  
35  
36  
37  
38  
39  
40  
41  
42  
43  
44  
45  
46  
47  
48  
49  
50  
51  
52  
53  
54  
55  
56  
57  
58  
59  
60

The ongoing need for out-of-country care in Ontario likely reflects inability to access care and/or  
to adequately manage complexity within eating disorder cases. Overall, there is a need for  
greater variability and availability of comprehensive care across the province, ideally aligned  
with patients' need; in other words, regionalised eating disorder care with higher levels of  
coordination, perhaps like the Ontario cancer care system. An ideal model of care might provide  
availability of basic services across the province, but have expertise for more complex cases  
centralised in large urban centres, like in the Netherlands (29). This alignment could potentially

1  
2  
3 improve care transitions and follow-up care, which are crucial given the high rates of relapse  
4 among these patients (30,31).  
5  
6  
7  
8  
9

### 10 ***Strengths and limitations***

11  
12 Our study examined an important policy issue within the Ontario health care context, and  
13 addressed a gap in the literature. Thus far, even internationally, there have been little data and  
14 research on the costs of eating disorders (4,32). Our work estimated *total* net costs for a specific  
15 group of patients with an eating disorder; most studies have examined only inpatient and  
16 outpatient costs for subgroups of patients. Furthermore, our study is the only one we are aware of  
17 that has estimated *net* costs. Contrary to other studies, our cost estimates represents the direct  
18 cost of eating disorders themselves.  
19  
20  
21  
22  
23  
24  
25  
26  
27  
28  
29  
30

31 We were not able to account for addiction-related health care costs from community-based  
32 agencies, where a large part of addiction treatment is provided (33). In addition, we were not  
33 able to capture OHIP-funded outpatient eating disorder treatment, other than that provided  
34 directly by psychiatrists. We were only able to include costs of outpatient prescription drugs for  
35 patients covered by the public provincial drug program (for this cohort, individuals receiving  
36 social assistance). Thus, our cost values are likely an underestimate. We also had limited ability  
37 to examine subpopulations of interest, including sex, type of eating disorder, and psychiatric  
38 comorbidity, and only examined patients who were approved for out-of-country care. Finally, we  
39 estimated direct costs incurred by the health care system and did not estimate other relevant  
40 costs, such as those covered under private health care plans, out-of-pocket costs, costs related to  
41  
42  
43  
44  
45  
46  
47  
48  
49  
50  
51  
52  
53  
54  
55  
56  
57  
58  
59  
60

1  
2  
3 inability to work (lost productivity) for patients and family members, and costs with death, which  
4  
5 are also lacking in the literature. Future research should examine this.  
6  
7  
8  
9

### 10 ***Conclusion***

11  
12 Costs of care associated with eating disorders are large and represent a substantial financial  
13  
14 burden to the health care system. We found that patients treated out-of-country and in Ontario  
15  
16 had higher costs than those treated out-of-country alone. Furthermore, we found that the main  
17  
18 cost drivers were out-of-country care and physician services. Given the high costs associated  
19  
20 with out-of-country care, there may be opportunity to redirect these funds to increase capacity  
21  
22 and expertise for eating disorder treatment within Ontario; this could reduce overall costs of care,  
23  
24 improve patients' experiences and create new jobs in the province. This would require additional  
25  
26 analyses around the estimation of cost-savings to the system in the long-run and the implications  
27  
28 for patient outcomes. Moreover, there may be scope to reorganise the eating disorder care system  
29  
30 in the province to achieve these goals.  
31  
32  
33  
34  
35  
36  
37  
38  
39  
40  
41  
42  
43  
44  
45  
46  
47  
48  
49  
50  
51  
52  
53  
54  
55  
56  
57  
58  
59  
60



## References

1. Zhu AJ, Walsh BT. Pharmacologic treatment of eating disorders. *Can J Psychiatry*. 2002; 47(3):227-234.
2. Agras WS. The consequences and costs of the eating disorders. *Psychiatr Clin North Am*. 2001; 24(2):371-379.
3. Sullivan PF. Mortality in anorexia nervosa. *Am J Psychiatry*. 1995; 152:1073-1074.
4. Striegel-Moore RH, Leslie D, Petrelli SA, et al. One-year use and cost of inpatient and outpatient services among female and male patients with an eating disorder: evidence from a national database of health insurance claims. *Int J Eat Disord*. 2000; 27(4):381-389.
5. Simon J, Schmidt U, Pilling S. The health service use and cost of eating disorders. *Psychol Med*. 2005; 35(11):1543-1551.
6. Ontario Ministry of Health and Long-term Care. Helping Youth with Eating Disorders Get Care Closer to Home [news release]. 2014 March 18. Available: <https://news.ontario.ca/mohltc/en/2014/03/helping-youth-with-eating-disorders-get-care-closer-to-home.html> (accessed 2016 April 20).

- 1  
2  
3 7. Ontario Ministry of Health and Long-term Care. Ministry Programs. Ontario Health  
4 Insurance Plan. OHIP Out of Country Health Services. 2012 June 10. Available:  
5  
6 <http://www.health.gov.on.ca/en/public/programs/ohip/outofcountry/default.aspx>  
7  
8 (accessed 2016 April 20).  
9  
10  
11  
12
- 13  
14  
15 8. Wodchis W, Bushmeneva K, Nikitovic M, et al. Guidelines on person-level costing  
16 using administrative databases in Ontario. Vol.1. 2013. Toronto ON, Health System  
17 Performance Research Network. Working Paper Series.  
18  
19  
20  
21
- 22  
23  
24 9. de Oliveira C, Bremner K, Pataky R, et al. The Costs of Cancer Care before and after  
25 Diagnosis for the 19 Most Common Cancers in Ontario, CMAJ Open. 2013a; 1(1): E1-  
26  
27 E8.  
28  
29  
30  
31  
32
- 33  
34 10. de Oliveira C, Bremner K, Pataky R, et al. Evaluation of Trends in the Cost of Initial  
35 Cancer Treatment in Ontario, CMAJ Open. 2013b; 1(4): E151-E158.  
36  
37  
38  
39  
40
- 41 11. de Oliveira C, Cheng J, Vigod S, Rehm J, Kurdyak P. Patients with High Mental Health  
42 Costs Incur Over 30 Percent More Costs than Other High Cost Patients. Health Aff  
43 (Millwood). 2016. 35(1): 36-43.  
44  
45  
46  
47  
48
- 49  
50 12. Hux JE, Ivis F, Flintoft V, Bica A. Diabetes in Ontario: determination of prevalence and  
51 incidence using a validated administrative data algorithm. Diabetes Care. 2002; 25:512-  
52  
53 516.  
54  
55  
56  
57  
58  
59  
60

- 1  
2  
3  
4  
5  
6  
7  
8  
9  
10  
11  
12  
13  
14  
15  
16  
17  
18  
19  
20  
21  
22  
23  
24  
25  
26  
27  
28  
29  
30  
31  
32  
33  
34  
35  
36  
37  
38  
39  
40  
41  
42  
43  
44  
45  
46  
47  
48  
49  
50  
51  
52  
53  
54  
55  
56  
57  
58  
59  
60
13. Gershon AS, Wang C, Vasilevska-Ristovska J, et al. Identifying Patients with physician diagnosed asthma in health administrative databases. *Can Respir J.* 2009; 16(6):183-188.
14. Tu K, Lipscombe LL, Chen ZL, for the CHEP Outcomes Research Taskforce. Prevalence and incidence of hypertension from 1995 to 2005: a population-based study. *CMAJ.* 2008; 178(11):1429-1435.
15. Knapp M, Mangalore R, Simon J. The global costs of schizophrenia. *Schizophr Bull.* 2004; 30:279-293.
16. Taplin SH, Barlow W, Urban N, et al. Stage, age, comorbidity, and direct costs of colon, prostate, and breast cancer care. *J Natl Cancer Inst.* 1995; 87(6):417-426.
17. Brown ML, Riley GF, Potosky AL, et al. Obtaining long-term disease specific costs of care: application to Medicare enrollees diagnosed with colorectal cancer. *Med Care.* 1999. 37(12):1249-1259.
18. Yabroff KR, Lamont EB, Mariotto A, et al. Cost of care for elderly cancer patients in the United States. *J Natl Cancer Inst.* 2008. 100(9):630-641.

- 1  
2  
3  
4  
5  
6  
7  
8  
9  
10  
11  
12  
13  
14  
15  
16  
17  
18  
19  
20  
21  
22  
23  
24  
25  
26  
27  
28  
29  
30  
31  
32  
33  
34  
35  
36  
37  
38  
39  
40  
41  
42  
43  
44  
45  
46  
47  
48  
49  
50  
51  
52  
53  
54  
55  
56  
57  
58  
59  
60
19. Care L, Mary B, Lindberg C, et al. External Review of the Ontario Health Insurance Plan's Out-of-Country Program. Toronto (ON): Ministry of Health and Long-term Care; 2007 (July).
20. Office of Health Economics. Eating Disorders : Anorexia Nervosa and Bulimia Nervosa [No. 111]. Office of Health Economics: London. 1994.
21. Krauth C, Buser K, Vogel H. How high are the costs of eating disorders - anorexia nervosa and bulimia nervosa - for German society? Eur J Health Econ. 2002; 3(4):244-250.
22. Mathers CD, Vos ET, Stevenson CE. The Burden of Disease and Injury in Australia. AIHW cat. no. PHE 17. Australian Institute of Health and Welfare: Canberra. 1999.
23. Beating eating disorders (BEAT). The costs of eating disorders, Social, health and economic impacts. 2015 February. Available: [https://www.beat.co.uk/assets/000/000/302/The\\_costs\\_of\\_eating\\_disorders\\_Final\\_original.pdf](https://www.beat.co.uk/assets/000/000/302/The_costs_of_eating_disorders_Final_original.pdf) (accessed 2016 June 28).
24. Fairburn CG, Bohn K. Eating disorder NOS (EDNOS): an example of the troublesome "not otherwise specified" (NOS) category in DSM-IV. Behav Res Ther. 2005; 43(6):691-701.

- 1  
2  
3  
4  
5  
6  
7  
8  
9  
10  
11  
12  
13  
14  
15  
16  
17  
18  
19  
20  
21  
22  
23  
24  
25  
26  
27  
28  
29  
30  
31  
32  
33  
34  
35  
36  
37  
38  
39  
40  
41  
42  
43  
44  
45  
46  
47  
48  
49  
50  
51  
52  
53  
54  
55  
56  
57  
58  
59  
60
25. Ontario Ministry of Finance. Ministry of Health and Long-Term Care - THE ESTIMATES, 2012-13 – Summary. <http://www.fin.gov.on.ca/en/budget/estimates/2012-13/volume1/MOHLTC.html> (accessed 2016 Juen 29)
26. Ministry of Health and Long-term Care. Helping Youth with Eating Disorders Get Care Closer to Home <http://news.ontario.ca/mohlhc/en/2014/03/helping-youth-with-eating-disorders-get-care-closer-to-home.html> (accessed June 29 2016).
27. Hay PJ, Mond J. How to ‘count the cost’ and measure burden? A review of health-related quality of life in people with eating disorders. *J Ment Health*. 2005; 14(6):539-552
28. Crow SJ, Nyman JA. The cost-effectiveness of treatment for anorexia nervosa. *Int J Eat Disord*. 2004; 35: 155-160.
29. Cramm JM, Tsiachristas A, Adams SA, et al. Evaluating Disease Management Programmes in the Netherlands. Institute of Health Policy & Management, Erasmus University Rotterdam. 2014.
30. Olmsted MP, Kaplan AS, Rockert W. Rate and prediction of relapse in bulimia nervosa. *Am J Psychiatry*. 1994; 151, 738-743.

- 1  
2  
3 31. Carter JC, Mercer-Lynn KB, Norwood SJ, et al. A prospective study of predictors of  
4 relapse in anorexia nervosa: Implications for relapse prevention. *Psychiatry Res.* 2012;  
5 200, 518-523.  
6  
7  
8  
9  
10  
11  
12 32. Toulany A, Wong M, Katzman DK et al. Cost analysis of inpatient treatment of anorexia  
13 nervosa in adolescents: hospital and caregiver perspectives. *CMAJ Open.* 2015;  
14 3(2):E192–E197.  
15  
16  
17  
18  
19  
20  
21  
22 33. Ogborne AC, Braun K, Rush BR. Developing an integrated information system for  
23 specialized addiction treatment agencies. *J Behav Health Serv Res.* 1998; 25(1): 100-107.  
24  
25  
26  
27  
28  
29  
30  
31  
32  
33  
34  
35  
36  
37  
38  
39  
40  
41  
42  
43  
44  
45  
46  
47  
48  
49  
50  
51  
52  
53  
54  
55  
56  
57  
58  
59  
60

**Title:**

Cost evaluation of out-of-country care for patients with eating disorders in Ontario: a population-based study

**Authors:**

Claire de Oliveira, MA PhD

Centre for Addiction and Mental Health; Institute for Health Policy, Management and Evaluation, University of Toronto; Institute for Clinical Evaluative Sciences

Erin M. Macdonald, MSc

Institute for Clinical Evaluative Sciences

Diane Green, BSc

Institute for Clinical Evaluative Sciences

Patricia Colton, MD MSc

Toronto General Hospital, University Health Network; Department of Psychiatry, University of Toronto

Marion Olmsted, PhD

Toronto General Hospital, University Health Network; Department of Psychiatry, University of Toronto

1  
2  
3 Susan Bondy, PhD  
4

5 Dalla Lana School of Public Health, University of Toronto; ICES  
6  
7  
8  
9

10 Paul Kurdyak, MD PhD  
11

12 Centre for Addiction and Mental Health; Department of Psychiatry and Institute for Health  
13 Policy, Management and Evaluation, University of Toronto; Institute for Clinical Evaluative  
14 Sciences  
15  
16  
17  
18  
19

20  
21  
22 **Correspondence to:**  
23

24 Claire de Oliveira  
25

26 [claire.deoliveira@camh.ca](mailto:claire.deoliveira@camh.ca)  
27  
28  
29  
30

31  
32 **Funding:**  
33

34 This study was supported by the Institute for Clinical Evaluative Sciences (ICES), which is  
35 funded by an annual grant from the Ontario Ministry of Health and Long-Term Care  
36 (MOHLTC).  
37  
38  
39  
40  
41  
42

43  
44 **Competing interests:**  
45

46 None declared.  
47  
48  
49

50  
51 **Disclaimer:**  
52

53 The opinions, results, and conclusions reported in this paper are those of the authors and are  
54 independent from the funding sources. No endorsement by ICES or the Ontario MOHLTC is  
55  
56  
57  
58  
59  
60



1  
2  
3 intended or should be inferred. Parts of this material are based on data and information compiled  
4  
5 and provided by the Canadian Institute for Health Information (CIHI). However, the analyses,  
6  
7 conclusions, opinions, and statements expressed herein are those of the authors, and not  
8  
9 necessarily those of CIHI.  
10  
11  
12  
13  
14  
15  
16  
17  
18  
19  
20  
21  
22  
23  
24  
25  
26  
27  
28  
29  
30  
31  
32  
33  
34  
35  
36  
37  
38  
39  
40  
41  
42  
43  
44  
45  
46  
47  
48  
49  
50  
51  
52  
53  
54  
55  
56  
57  
58  
59  
60

Confidential

## Abstract

**Background:** Eating disorders, specifically anorexia nervosa, bulimia nervosa and eating disorder not otherwise specified, represent a substantial burden to the health care system. To address this, the Ontario government made an investment in eating disorders treatment in 2007. Our goal was to estimate the economic burden of patients who received specialised out-of-country eating disorder care.

**Method:** We conducted a cost-of-illness study evaluating health care costs among individuals in Ontario who received specialised out-of-country eating disorder care from 2003 to 2011, from the public third-party payer perspective. Using linked administrative databases, we estimated net costs of eating disorders for two patient groups – patients who received specialised out-of-country and in-province inpatient care (n=160), and patients who received specialised out-of-country inpatient care only (n=126).

**Results:** Patients approved for specialised out-of-country eating disorder care were mostly young females from high-income, urban neighbourhoods. Total annual net costs varied annually, and were higher for patients treated out-of-country and in province (\$11.0 million before 2007, \$6.5 million after) compared to those treated out-of-country alone (\$5.0 million before 2007, \$2.0 million after). The main cost drivers were out-of-country care and physician services.

**Interpretation:** Costs associated with eating disorder care represent a substantial economic burden to the Ontario health care system. Given the high costs of out-of-country care, there may be opportunity to redirect these funds to increase capacity and expertise for eating disorder treatment within Ontario; this may potentially reduce patient and systems costs, improve patient access and continuity of care, and create new jobs in Ontario.

## Background

1  
2  
3  
4  
5  
6  
7  
8  
9  
10  
11  
12  
13  
14  
15  
16  
17  
18  
19  
20  
21  
22  
23  
24  
25  
26  
27  
28  
29  
30  
31  
32  
33  
34  
35  
36  
37  
38  
39  
40  
41  
42  
43  
44  
45  
46  
47  
48  
49  
50  
51  
52  
53  
54  
55  
56  
57  
58  
59  
60

Approximately 3% of women are affected by an eating disorder (ED) in their lifetime (1). These disorders are associated with high levels of comorbid psychopathology, such as mood and anxiety disorders, post-traumatic stress disorder, and substance use disorders (2). In addition, anorexia nervosa has the highest mortality rate of any psychiatric disorder (3). These consequences are reflected in high costs of care (2). Prior research suggests that age-adjusted treatment costs for anorexia nervosa and bulimia nervosa are comparable to those for schizophrenia (4). Other work has shown that eating disorders are associated with high direct and indirect health care costs (5). Yet, precise cost estimates are currently lacking.

Eating disorders represent a substantial economic burden to the Ontario health care system. To address this burden, the Ontario government made an investment in eating disorders treatment within the province in 2007. In addition to funding treatment within the province, the Ontario Ministry of Health and Long-term Care spends funds to send patients to the United States to receive specialised eating disorder treatment for complex cases, which cannot be treated in-province due to lack of resources, or when wait times for in-province treatment are deemed unacceptably long. This care is specifically for patients with serious, treatment-interfering post-traumatic stress disorder or substance use disorders concurrent with an ED. Furthermore, some patients may receive additional specialised care in-province; this is typically based on the care protocol defined by the specialist.

To be eligible for out-of-country care, patients must be diagnosed with an eating disorder by a specialist at one of Ontario's funded inpatient programs for eating disorders. The specialist

1  
2  
3 submits the application on behalf of the patient to the Ontario Out-of-Country Health Coverage  
4 Program, which makes decisions regarding coverage for medical and hospital services performed  
5 outside of Canada. This program reviews these applications, undertaking research and/or  
6 consults with experts as required, and decides whether applicants are approved; these decisions  
7 are largely based on disease severity.  
8  
9  
10  
11  
12  
13  
14  
15  
16

17 It may be possible to reinvest funds spent on out-of-country eating disorder care to develop and  
18 augment programs within Ontario. This could potentially reduce overall costs, including out-of-  
19 pocket expenses, improve patients' experiences and create additional jobs in Ontario (6).  
20  
21  
22  
23

24 Currently there is no protocol for transitional or follow-up care upon a patient's return to  
25 Ontario. Instead, follow-up care is provided by the patient's current care provider. Given the  
26 high risk of relapse during this transition period, disjointed care in different jurisdictions may  
27 contribute to poorer patient outcomes and additional treatment costs, although these data have  
28 not been collected.  
29  
30  
31  
32  
33  
34  
35  
36  
37  
38

39 The purpose of this study was to estimate the total costs of patients with an eating disorder who  
40 received *specialised out-of-country care*, from the perspective of the public third-party payer . A  
41 careful evaluation of these costs may be useful to determine whether developing further  
42 specialised in-province services is financially justified. These findings will have significant  
43 policy implications for the Ontario government and other jurisdictions with similar out-of-  
44 country programs, such as British Columbia.  
45  
46  
47  
48  
49  
50  
51  
52  
53  
54

## 55 **Method**

56  
57  
58  
59  
60

### *Study design and setting*

We conducted a cost of illness study. Our patient cohort included all individuals with an eating disorder covered under the Ontario Health Insurance Plan (OHIP) who applied and received specialised out-of-country care from April 1 2000 to March 31 2012. This cohort was divided into two groups, according to whether patients received additional specialized in-province inpatient care or not. We matched each patient to a set of control subjects with no history of an eating disorder to estimate net costs.

During our analysis period, namely in 2007, the Ontario government made a significant investment in eating disorders treatment within the province, which led to a decrease in the number of out-of-country applications.

### *Data Sources*

Data on all applicants who received out-of-country care for eating disorders were obtained from the Ministry of Health and Long-term Care's out-of-country program database, which includes all records on out-of-country care. These data included information on the status of the application (approved, denied, cancelled, awaiting information, pending), name of the out-of-country provider, total amount billed and paid by the province, service start and end dates, and the condition for which care was provided (eating disorder, substance abuse, other psychiatric disorders). Further information on the out-of-country care program can be found elsewhere (7).

In addition, we used administrative health care databases available through the Institute for Clinical Evaluative Sciences in Toronto, Ontario, to obtain data on all health services

1  
2  
3 provided within province and covered by the Ministry of Health and Long-term Care (only).  
4  
5 These databases have been validated and described in the literature (8), and have been used  
6  
7 previously for costing analyses in Ontario (9-11). A full description of each database can be  
8  
9 found in the Appendix. These databases were linked using unique encoded identifiers and  
10  
11 analyzed at the Institute for Clinical Evaluative Sciences. This study was approved by the  
12  
13 Research Ethics Board at Sunnybrook Health Sciences Centre, Toronto, Canada.  
14  
15  
16  
17  
18  
19

### 20 *Patient Cohort*

21  
22 We included patients diagnosed with anorexia nervosa, bulimia nervosa and eating disorder not  
23  
24 otherwise specified (International Classification of Diseases (ICD)-9 codes 307.1, 307.50,  
25  
26 307.51; ICD-10 codes F50.0-F50.3, F50.8, F50.9; and Diagnostic and Statistical Manual of  
27  
28 Mental Disorders, 4<sup>th</sup> edition codes 307.1, 307.50, 307.51). We excluded individuals diagnosed  
29  
30 with Prader-Willi syndrome (ICD-9 759.81 code; no specific ICD-10 code was available), a rare  
31  
32 genetic disorder associated with excessive eating and obesity; individuals who did not reside in  
33  
34 Ontario at time of diagnosis; those who did not have a valid OHIP number during the analysis  
35  
36 period; and patients with missing information on age and/or sex. We also excluded patients who  
37  
38 first applied for out-of-country care outside the study period, those who were denied or cancelled  
39  
40 out-of-country care, and patients with missing information on the out-of-country application  
41  
42 status. Our final cohort included all patients who received specialised out-of-country eating  
43  
44 disorder treatment (and thus similar disease severity). This cohort was further divided into two  
45  
46 groups, differing only in terms of whether they received specialised in-province care or not.  
47  
48  
49  
50  
51  
52  
53  
54

### 55 *Analysis*

### *Socio-demographic and clinical characteristics*

We compared both patient groups on socio-demographic characteristics, such as age, sex, neighbourhood income quintile (at the Census tract level) and urban/rural residence, and comorbidity, such as diabetes, asthma and hypertension, which were defined using validated algorithms (12-14).

### *Estimation of costs of care*

Costs for out-of-country care were available in the OHIP claims database (fee codes H700, H820, H830 and H850). Costs, in American dollars, were converted to Canadian dollars using monthly exchange rates, and adjusted to 2012 values.

To estimate direct costs for in-province care, we used a costing algorithm (8) available at the Institute for Clinical Evaluative Sciences. Complete cost data were not available for the entire analysis period, and therefore estimated from 2003 to 2011 only. These included costs of inpatient hospitalizations (psychiatric and non-psychiatric), emergency department visits, other ambulatory care, physician visits, lab tests, outpatient prescription drugs covered under the public provincial drug program, complex continuing care, long-term care, home care, rehabilitation and assistive devices (see Appendix). All costs were adjusted to 2012 Canadian dollars.

Standard costing methodology employed a bottom-up (micro-costing) approach to cost services at the individual level (8). This approach made use of individual episodes of care or utilization in the health system and attached prices (or costs or amounts paid by the Ministry of Health and

1  
2  
3 Long-term Care) to each one. A top-down approach, which allocates corporate aggregate  
4  
5 (institutional) costs to individual visits or to cases or episodes of care, was applied when  
6  
7 individual unit costs were not available (for example, for institutional care settings) (8). Further  
8  
9 details on the costing methodology can be found elsewhere (8).  
10  
11

12  
13  
14  
15 Many cost-of-illness studies have been criticized for attributing all costs to a single disorder,  
16  
17 despite most patients having other health problems that also require care (15). Therefore, we  
18  
19 employed the ‘net cost’ method to obtain an estimate of the cost of an eating disorder. This  
20  
21 method consists of matching patients who have an eating disorder to patients who do not  
22  
23 (control subjects) on variables associated with resource use, and subtracting the costs incurred by  
24  
25 the former from those incurred by the latter (16-18). Patients with an eating disorder were  
26  
27 matched to control subjects on age, sex and neighbourhood income quintile on a 1:4 ratio, for a  
28  
29 total of 1,144 control subjects. The net cost method was only applied to costs incurred in  
30  
31 Ontario; out-of-country costs were over and above net costs.  
32  
33  
34  
35  
36  
37  
38

## 39 **Results**

40  
41 We started with all out-of-country applicants (n=1,854). We excluded those who did not meet  
42  
43 our eating disorder care definition (n=1,295), those who first applied outside our study window  
44  
45 (n=62), and those who were denied out-of-country care, whose care was cancelled or had  
46  
47 missing information (n=211) (Figure 1). Patients who were approved care were younger than  
48  
49 those denied care (median age of 18 versus 23, respectively), but similar on all other patient  
50  
51 characteristics (results available upon request). This was also the case for those with cancelled  
52  
53 care and missing information. Our final cohort included all patients who first applied and were  
54  
55  
56  
57  
58  
59  
60



1  
2  
3 approved for out-of-country care between fiscal years 2000 and 2012 (n=286), which was further  
4  
5 divided into two patient groups – those who did not receive additional specialised in-province  
6  
7 inpatient care during the study period (n=126), and those who did (n=160) .  
8  
9

### 10 11 12 *Socio-demographic and clinical characteristics*

13  
14 Patient groups differed mostly in terms of age and sex, but were similar on all other socio-  
15  
16 demographic and clinical characteristics (Table 1). There was a slightly higher proportion of  
17  
18 female patients among those who received specialised out-of-country and in-province inpatient  
19  
20 care (98% vs. 91%). Patients who received both specialised out-of-country and in-province  
21  
22 inpatient care were roughly 4 years younger than those who received specialised out-of-country  
23  
24 care only. Most patients were from high-income, urban neighbourhoods. Less than 7% had  
25  
26 diabetes or hypertension; a quarter of patients had asthma.  
27  
28  
29  
30  
31  
32  
33

### 34 *Estimation of costs*

35  
36 The number of funded out-of-country applications increased from 2000 to 2006, and decreased  
37  
38 thereafter (Figure 2). Total annual net costs were estimated from 2003 to 2011; these varied  
39  
40 accordingly with the number of funded applications approved each year. Overall, there was an  
41  
42 inverted u-shape curve in costs over time for both patient groups (Figures 3a and b).  
43  
44  
45  
46  
47

48 Total annual costs per year were approximately \$5 million before 2007 and \$2 million thereafter  
49  
50 for patients who received specialised out-of-country inpatient care only (Figure 3a), and \$11  
51  
52 million before 2007 and \$6.5 million after 2007 for patients who received both specialised out-  
53  
54 of-country and in-province inpatient care (Figure 3b).  
55  
56  
57  
58  
59  
60

1  
2  
3  
4  
5  
6 In-province costs for patients who receive specialised out-of-country inpatient care only were  
7  
8 just under \$3 million per year until 2007, and decreased to around \$1.5 million per year  
9  
10 thereafter (Figure 3a). Out-of-country costs for this group were slightly lower than in-province  
11  
12 costs and followed a similar temporal pattern (\$2.3 million before 2007, \$0.5 million after)  
13  
14 (Figure 3a).  
15  
16

17  
18  
19  
20 In-province costs were substantially higher for patients who received both specialised out-of-  
21  
22 country and in-province care – just under \$7 million annually until 2007 (except in 2003), and  
23  
24 about \$5 million per year afterwards (3) (Figure 3b). Out-of-country costs were slightly lower,  
25  
26 but followed a similar pattern (around \$4 million in the first years and about \$1.5 million in the  
27  
28 later years) (Figure 3b).  
29  
30  
31

32  
33  
34 On average, out-of-country and physician costs were the largest contributors to the overall cost  
35  
36 for both patient groups. Costs of inpatient hospitalizations were also important cost drivers,  
37  
38 mainly for patients who received specialised in-province care. Costs with other health services  
39  
40 represented a small percentage ( $\leq 5\%$ ) of the overall cost for all patients (not shown).  
41  
42  
43

#### 44 45 46 **Interpretation**

47  
48 Patients with eating disorders have high health care utilization and costs (5). The management  
49  
50 of health care costs and avoidance of out-of-country care are a high priority for Ontario;  
51  
52 however, little is known about the costs of treating patients with eating disorders. We estimated  
53  
54 total *net* costs for two patient groups that were approved for and received specialised out-of-  
55  
56  
57  
58  
59  
60

1  
2  
3 country care. Most patients were young, female and from high-income, urban neighbourhoods.  
4  
5 Total net costs were higher for patients who received both specialised out-of-country and in-  
6  
7 province inpatient care, suggesting these patients are complex cases. The major contributors to  
8  
9 the overall cost were out-of-country care and physician services, and to a lesser degree, in-  
10  
11 province inpatient hospitalizations. Although we observed a decrease in costs in 2007, due to  
12  
13 significant changes in the out-of-country care program (19), the costs of this program remained a  
14  
15 relatively large component of the economic burden of eating disorders to the province.  
16  
17  
18  
19  
20

21  
22 A comprehensive literature review identified only six studies worldwide on health services use  
23  
24 and costs among individuals with an eating disorder. Most studies were dated and results varied  
25  
26 greatly (5). In the UK, the direct health care system cost of anorexia nervosa was estimated at  
27  
28 £4.2 million in 1990 (20); in Germany, the cost was €65 million for anorexia nervosa and €10  
29  
30 million for bulimia nervosa in 1998 (21). In Australia health care costs of EDs were Aus\$22  
31  
32 million in 1993/1994 (22). Other cost studies that focused mostly on inpatient care reported  
33  
34 highly variable estimates. More recent work from the UK has shown that total treatment costs to  
35  
36 the National Health Service may vary between £3.9 billion and £ 4.6 billion (23). Despite high  
37  
38 health care utilization among these individuals, results in most studies were likely gross  
39  
40 underestimates of the full magnitude of the economic burden as only inpatient costs were  
41  
42 captured (21), or results were based on limited cost data (4). Furthermore, only one study  
43  
44 reported specific information on service use of eating disorder not otherwise specified (4), the  
45  
46 most common diagnosis encountered in clinical practice (24). We did not find any studies that  
47  
48 estimated net costs or that examined an out-of-country program; thus, our estimates are not  
49  
50 directly comparable to previous work. Nonetheless, we found that our estimates were quite  
51  
52  
53  
54  
55  
56  
57  
58  
59  
60

1  
2  
3 substantial even for a very small group of patients (n=286), with out-of-country costs  
4  
5 representing a small proportion of the Ontario health care budget (0.005% in 2012) (25).  
6  
7

8 Evidence suggests that average daily treatment costs in-province are lower than those out-of-  
9  
10 country (\$918 versus \$1,285, respectively) (26).  
11  
12  
13

14  
15 Complete cost estimates for patients with eating disorders are required to determine cost-  
16  
17 effective treatment options (5); yet, these are generally lacking in the literature (27). Few studies  
18  
19 have examined the cost-effectiveness of eating disorder-related interventions (28). Thus, our cost  
20  
21 estimates may be useful inputs for researchers undertaking economic evaluations. Furthermore,  
22  
23 they may help inform policy discussions in Ontario and other jurisdictions with similar funded  
24  
25 out-of-country care programs, such as British Columbia.  
26  
27  
28

29  
30  
31 The ongoing need for out-of-country care in Ontario likely reflects inability to access care and/or  
32  
33 to adequately manage complexity within eating disorder cases. Overall, there is a need for  
34  
35 greater variability and availability of comprehensive care across the province, ideally aligned  
36  
37 with patients' need; in other words, regionalised eating disorder care with higher levels of  
38  
39 coordination, perhaps like the Ontario cancer care system. An ideal model of care might provide  
40  
41 availability of basic services across the province, but have expertise for more complex cases  
42  
43 centralised in large urban centres, like in the Netherlands (29). This alignment could potentially  
44  
45 improve care transitions and follow-up care, which are crucial given the high rates of relapse  
46  
47 among these patients (30,31).  
48  
49  
50  
51

52  
53  
54  
55 ***Strengths and limitations***  
56  
57  
58  
59  
60

1  
2  
3 Our study examined an important policy issue within the Ontario health care context, and  
4 addressed a gap in the literature. Thus far, even internationally, there have been little data and  
5 research on the costs of eating disorders (4,32). Our work estimated *total* net costs for a specific  
6 group of patients with an eating disorder; most studies have examined only inpatient and  
7 outpatient costs for subgroups of patients. Furthermore, our study is the only one we are aware of  
8 that has estimated *net* costs. Contrary to other studies, our cost estimates represents the direct  
9 cost of eating disorders themselves.  
10  
11  
12  
13  
14  
15  
16  
17  
18  
19  
20

21  
22 We were not able to account for addiction-related health care costs from community-based  
23 agencies, where a large part of addiction treatment is provided (33). In addition, we were not  
24 able to capture OHIP-funded outpatient eating disorder treatment, other than that provided  
25 directly by psychiatrists. We were only able to include costs of outpatient prescription drugs for  
26 patients covered by the public provincial drug program (for this cohort, individuals receiving  
27 social assistance). Thus, our cost values are likely an underestimate. We also had limited ability  
28 to examine subpopulations of interest, including sex, type of eating disorder, and psychiatric  
29 comorbidity, and only examined patients who were approved for out-of-country care. Finally, we  
30 estimated direct costs incurred by the health care system and did not estimate other relevant  
31 costs, such as those covered under private health care plans, out-of-pocket costs, costs related to  
32 inability to work (lost productivity) for patients and family members, and costs with death, which  
33 are also lacking in the literature. Future research should examine this.  
34  
35  
36  
37  
38  
39  
40  
41  
42  
43  
44  
45  
46  
47  
48  
49  
50

## 51 52 53 ***Conclusion*** 54 55 56 57 58 59 60

1  
2  
3 Costs of care associated with eating disorders are large and represent a substantial financial  
4  
5 burden to the health care system. We found that patients treated out-of-country and in Ontario  
6  
7 had higher costs than those treated out-of-country alone. Furthermore, we found that the main  
8  
9 cost drivers were out-of-country care and physician services. Given the high costs associated  
10  
11 with out-of-country care, there may be opportunity to redirect these funds to increase capacity  
12  
13 and expertise for eating disorder treatment within Ontario; this could reduce overall costs of care,  
14  
15 improve patients' experiences and create new jobs in the province. This would require additional  
16  
17 analyses around the estimation of cost-savings to the system in the long-run and the implications  
18  
19 for patient outcomes. Moreover, there may be scope to reorganise the eating disorder care system  
20  
21 in the province to achieve these goals.  
22  
23  
24  
25  
26  
27  
28  
29  
30  
31  
32  
33  
34  
35  
36  
37  
38  
39  
40  
41  
42  
43  
44  
45  
46  
47  
48  
49  
50  
51  
52  
53  
54  
55  
56  
57  
58  
59  
60

Confidential

## References

1. Zhu AJ, Walsh BT. Pharmacologic treatment of eating disorders. *Can J Psychiatry*. 2002; 47(3):227-234.
2. Agras WS. The consequences and costs of the eating disorders. *Psychiatr Clin North Am*. 2001; 24(2):371-379.
3. Sullivan PF. Mortality in anorexia nervosa. *Am J Psychiatry*. 1995; 152:1073-1074.
4. Striegel-Moore RH, Leslie D, Petrelli SA, et al. One-year use and cost of inpatient and outpatient services among female and male patients with an eating disorder: evidence from a national database of health insurance claims. *Int J Eat Disord*. 2000; 27(4):381-389.
5. Simon J, Schmidt U, Pilling S. The health service use and cost of eating disorders. *Psychol Med*. 2005; 35(11):1543-1551.
6. Ontario Ministry of Health and Long-term Care. Helping Youth with Eating Disorders Get Care Closer to Home [news release]. 2014 March 18. Available: <https://news.ontario.ca/mohltc/en/2014/03/helping-youth-with-eating-disorders-get-care-closer-to-home.html> (accessed 2016 April 20).

- 1  
2  
3 7. Ontario Ministry of Health and Long-term Care. Ministry Programs. Ontario Health  
4 Insurance Plan. OHIP Out of Country Health Services. 2012 June 10. Available:  
5  
6 <http://www.health.gov.on.ca/en/public/programs/ohip/outofcountry/default.aspx>  
7  
8 (accessed 2016 April 20).  
9  
10
- 11  
12  
13  
14  
15 8. Wodchis W, Bushmeneva K, Nikitovic M, et al. Guidelines on person-level costing  
16 using administrative databases in Ontario. Vol.1. 2013. Toronto ON, Health System  
17 Performance Research Network. Working Paper Series.  
18  
19
- 20  
21  
22  
23  
24 9. de Oliveira C, Bremner K, Pataky R, et al. The Costs of Cancer Care before and after  
25 Diagnosis for the 19 Most Common Cancers in Ontario, CMAJ Open. 2013a; 1(1): E1-  
26  
27 E8.  
28  
29  
30  
31  
32
- 33  
34 10. de Oliveira C, Bremner K, Pataky R, et al. Evaluation of Trends in the Cost of Initial  
35 Cancer Treatment in Ontario, CMAJ Open. 2013b; 1(4): E151-E158.  
36  
37  
38  
39
- 40  
41 11. de Oliveira C, Cheng J, Vigod S, Rehm J, Kurdyak P. Patients with High Mental Health  
42 Costs Incur Over 30 Percent More Costs than Other High Cost Patients. Health Aff  
43 (Millwood). 2016. 35(1): 36-43.  
44  
45  
46  
47  
48
- 49  
50 12. Hux JE, Ivis F, Flintoft V, Bica A. Diabetes in Ontario: determination of prevalence and  
51 incidence using a validated administrative data algorithm. Diabetes Care. 2002; 25:512-  
52  
53 516.  
54  
55  
56  
57  
58  
59  
60



- 1  
2  
3  
4  
5  
6  
7  
8  
9  
10  
11  
12  
13  
14  
15  
16  
17  
18  
19  
20  
21  
22  
23  
24  
25  
26  
27  
28  
29  
30  
31  
32  
33  
34  
35  
36  
37  
38  
39  
40  
41  
42  
43  
44  
45  
46  
47  
48  
49  
50  
51  
52  
53  
54  
55  
56  
57  
58  
59  
60
13. Gershon AS, Wang C, Vasilevska-Ristovska J, et al. Identifying Patients with physician diagnosed asthma in health administrative databases. *Can Respir J.* 2009; 16(6):183-188.
14. Tu K, Lipscombe LL, Chen ZL, for the CHEP Outcomes Research Taskforce. Prevalence and incidence of hypertension from 1995 to 2005: a population-based study. *CMAJ.* 2008; 178(11):1429-1435.
15. Knapp M, Mangalore R, Simon J. The global costs of schizophrenia. *Schizophr Bull.* 2004; 30:279-293.
16. Taplin SH, Barlow W, Urban N, et al. Stage, age, comorbidity, and direct costs of colon, prostate, and breast cancer care. *J Natl Cancer Inst.* 1995; 87(6):417-426.
17. Brown ML, Riley GF, Potosky AL, et al. Obtaining long-term disease specific costs of care: application to Medicare enrollees diagnosed with colorectal cancer. *Med Care.* 1999. 37(12):1249-1259.
18. Yabroff KR, Lamont EB, Mariotto A, et al. Cost of care for elderly cancer patients in the United States. *J Natl Cancer Inst.* 2008. 100(9):630-641.

- 1  
2  
3  
4  
5  
6  
7  
8  
9  
10  
11  
12  
13  
14  
15  
16  
17  
18  
19  
20  
21  
22  
23  
24  
25  
26  
27  
28  
29  
30  
31  
32  
33  
34  
35  
36  
37  
38  
39  
40  
41  
42  
43  
44  
45  
46  
47  
48  
49  
50  
51  
52  
53  
54  
55  
56  
57  
58  
59  
60
19. Care L, Mary B, Lindberg C, et al. External Review of the Ontario Health Insurance Plan's Out-of-Country Program. Toronto (ON): Ministry of Health and Long-term Care; 2007 (July).
20. Office of Health Economics. Eating Disorders : Anorexia Nervosa and Bulimia Nervosa [No. 111]. Office of Health Economics: London. 1994.
21. Krauth C, Buser K, Vogel H. How high are the costs of eating disorders - anorexia nervosa and bulimia nervosa - for German society? Eur J Health Econ. 2002; 3(4):244-250.
22. Mathers CD, Vos ET, Stevenson CE. The Burden of Disease and Injury in Australia. AIHW cat. no. PHE 17. Australian Institute of Health and Welfare: Canberra. 1999.
23. Beating eating disorders (BEAT). The costs of eating disorders, Social, health and economic impacts. 2015 February. Available: [https://www.beat.co.uk/assets/000/000/302/The\\_costs\\_of\\_eating\\_disorders\\_Final\\_original.pdf](https://www.beat.co.uk/assets/000/000/302/The_costs_of_eating_disorders_Final_original.pdf) (accessed 2016 June 28).
24. Fairburn CG, Bohn K. Eating disorder NOS (EDNOS): an example of the troublesome "not otherwise specified" (NOS) category in DSM-IV. Behav Res Ther. 2005; 43(6):691-701.

- 1  
2  
3  
4  
5  
6  
7  
8  
9  
10  
11  
12  
13  
14  
15  
16  
17  
18  
19  
20  
21  
22  
23  
24  
25  
26  
27  
28  
29  
30  
31  
32  
33  
34  
35  
36  
37  
38  
39  
40  
41  
42  
43  
44  
45  
46  
47  
48  
49  
50  
51  
52  
53  
54  
55  
56  
57  
58  
59  
60
25. Ontario Ministry of Finance. Ministry of Health and Long-Term Care - THE ESTIMATES, 2012-13 – Summary. <http://www.fin.gov.on.ca/en/budget/estimates/2012-13/volume1/MOHLTC.html> (accessed 2016 Juen 29)
26. Ministry of Health and Long-term Care. Helping Youth with Eating Disorders Get Care Closer to Home <http://news.ontario.ca/mohlhc/en/2014/03/helping-youth-with-eating-disorders-get-care-closer-to-home.html> (accessed June 29 2016).
27. Hay PJ, Mond J. How to ‘count the cost’ and measure burden? A review of health-related quality of life in people with eating disorders. *J Ment Health*. 2005; 14(6):539-552
28. Crow SJ, Nyman JA. The cost-effectiveness of treatment for anorexia nervosa. *Int J Eat Disord*. 2004; 35: 155-160.
29. Cramm JM, Tsiachristas A, Adams SA, et al. Evaluating Disease Management Programmes in the Netherlands. Institute of Health Policy & Management, Erasmus University Rotterdam. 2014.
30. Olmsted MP, Kaplan AS, Rockert W. Rate and prediction of relapse in bulimia nervosa. *Am J Psychiatry*. 1994; 151, 738-743.

1  
2  
3  
4  
5  
6  
7  
8  
9  
10  
11  
12  
13  
14  
15  
16  
17  
18  
19  
20  
21  
22  
23  
24  
25  
26  
27  
28  
29  
30  
31  
32  
33  
34  
35  
36  
37  
38  
39  
40  
41  
42  
43  
44  
45  
46  
47  
48  
49  
50  
51  
52  
53  
54  
55  
56  
57  
58  
59  
60

31. Carter JC, Mercer-Lynn KB, Norwood SJ, et al. A prospective study of predictors of relapse in anorexia nervosa: Implications for relapse prevention. *Psychiatry Res.* 2012; 200, 518-523.

32. Toulany A, Wong M, Katzman DK et al. Cost analysis of inpatient treatment of anorexia nervosa in adolescents: hospital and caregiver perspectives. *CMAJ Open.* 2015; 3(2):E192–E197.

33. Ogborne AC, Braun K, Rush BR. Developing an integrated information system for specialized addiction treatment agencies. *J Behav Health Serv Res.* 1998; 25(1): 100-107.

Confidential

**Table 1.** Socio-demographic and clinical characteristics of patients with eating disorders who received specialised out-of-country inpatient care by patient group

|                                         | <b>Patients who did not receive specialised eating disorder inpatient care in Ontario</b><br>N=126 (100%) | <b>Patients who received specialised eating disorder inpatient care in Ontario</b><br>N=160 (100%) | <b>p-value</b> |
|-----------------------------------------|-----------------------------------------------------------------------------------------------------------|----------------------------------------------------------------------------------------------------|----------------|
| <b>Sex</b>                              |                                                                                                           |                                                                                                    |                |
| Male                                    | 11 (8.7%)                                                                                                 | <=5                                                                                                | 0.0295         |
| Female                                  | 115 (91.3%)                                                                                               | 157 (> 98%)                                                                                        |                |
| <b>Age at time of first application</b> |                                                                                                           |                                                                                                    |                |
| Mean $\pm$ SD                           | 24.2 $\pm$ 10.3                                                                                           | 20.3 $\pm$ 7.6                                                                                     | 0.0003         |
| Median (IQR)                            | 21 (17-28)                                                                                                | 17 (16-23)                                                                                         |                |
| <b>Neighbourhood income quintile</b>    |                                                                                                           |                                                                                                    |                |
| 1 (low)                                 | 16 (12.7%)                                                                                                | 19 (11.9%)                                                                                         | 0.9956         |
| 2 (medium low)                          | 14 (11.1%)                                                                                                | 19 (11.9%)                                                                                         |                |
| 3 (medium)                              | 25 (19.8%)                                                                                                | 30 (18.8%)                                                                                         |                |
| 4 (medium-high)                         | 26 (20.6%)                                                                                                | 32 (20.0%)                                                                                         |                |
| 5 (high)                                | 45 (35.7%)                                                                                                | 60 (37.5%)                                                                                         |                |
| <b>Rural residence</b>                  | 13 (10.3%)                                                                                                | 11 (6.9%)                                                                                          | 0.2972         |
| <b>Diabetes</b>                         | 6 (4.8%)                                                                                                  | <=5                                                                                                | 0.3012         |
| <b>Asthma</b>                           | 30 (23.8%)                                                                                                | 39 (24.4%)                                                                                         | 0.9116         |
| <b>Hypertension</b>                     | 7 (5.6%)                                                                                                  | 11 (6.9%)                                                                                          | 0.3426         |

**Legend:** SD – standard deviation; IQR – interquartile range

1  
2  
3  
4  
5  
6  
7  
8  
9  
10  
11  
12  
13  
14  
15  
16  
17  
18  
19  
20  
21  
22  
23  
24  
25  
26  
27  
28  
29  
30  
31  
32  
33  
34  
35  
36  
37  
38  
39  
40  
41  
42  
43  
44  
45  
46  
47  
48  
49

**Figure 1.** Patient selection flow chart for out-of-country applicants with an eating disorder (from April 1<sup>st</sup>, 2000 to March 31<sup>st</sup>, 2012)

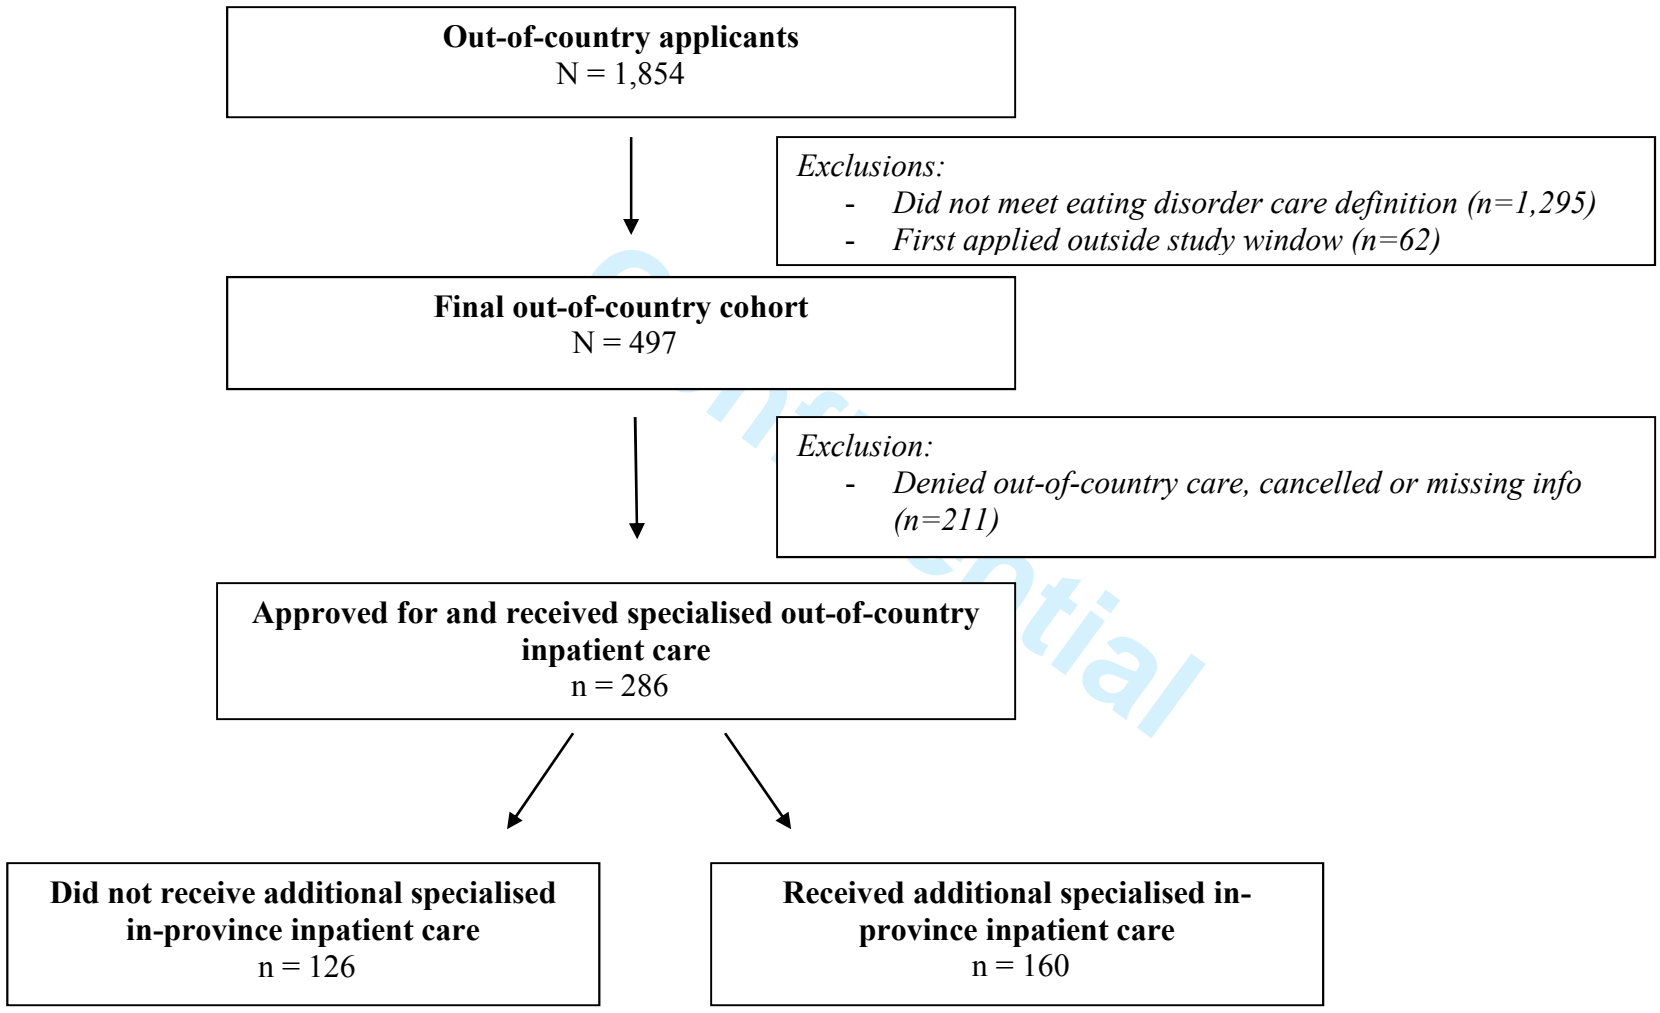

**Figure 2.** Number of funded out-of-country eating disorder applications by year of application

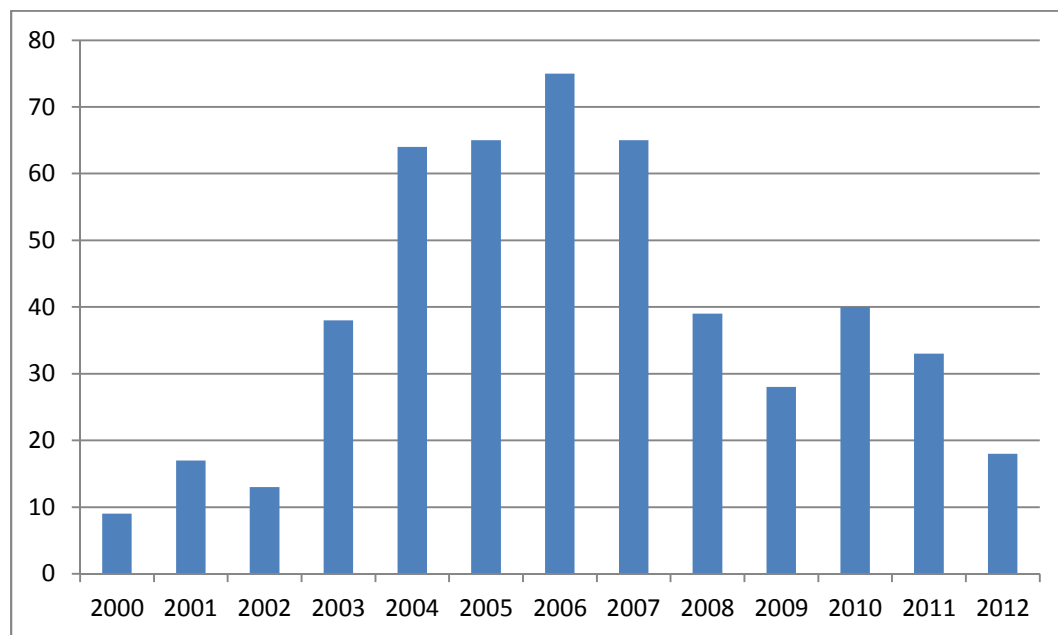

**Note:** 2012 does not correspond to the full fiscal year

1  
2  
3  
4  
5  
6  
7  
8  
9  
10  
11  
12  
13  
14  
15  
16  
17  
18  
19  
20  
21  
22  
23  
24  
25  
26  
27  
28  
29  
30  
31  
32  
33  
34  
35  
36  
37  
38  
39  
40  
41  
42  
43  
44  
45  
46  
47  
48  
49  
50  
51  
52  
53  
54  
55  
56  
57  
58  
59  
60

**Figure 3a.** Total annual net costs for patients with eating disorders who received specialised out-of-country inpatient care only, by year and type of specialised care (in 2012 CAD)

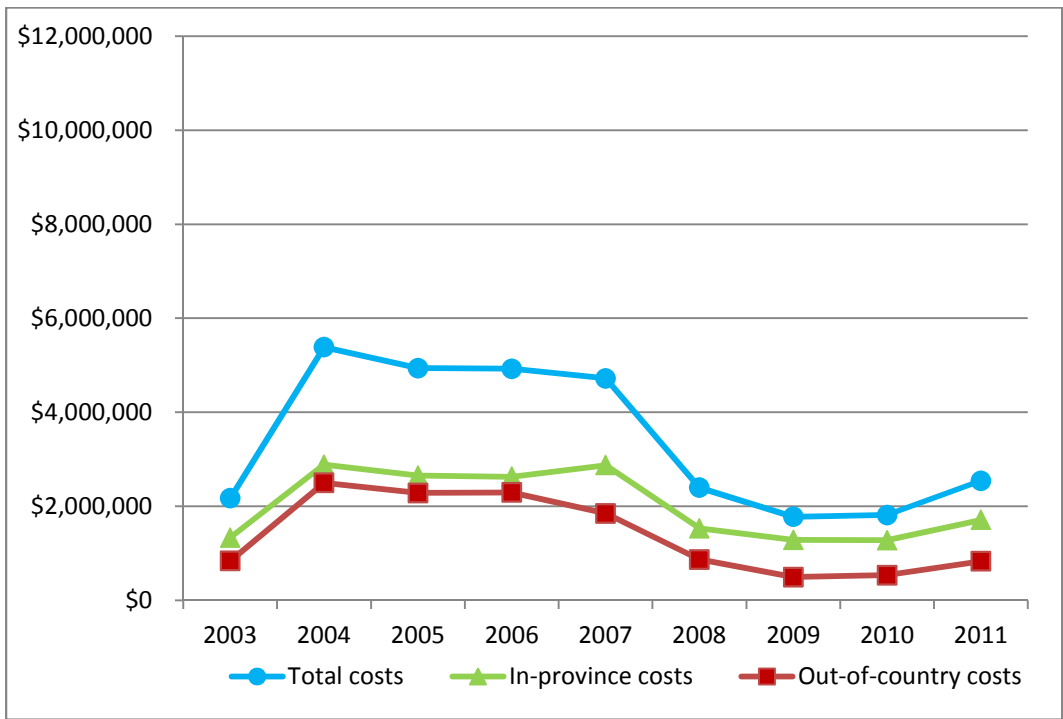

Confidential



**Figure 3b.** Total annual net costs for patients with eating disorders who received specialised out-of-country and in-province inpatient care, by year and type of specialised care (in 2012 CAD)

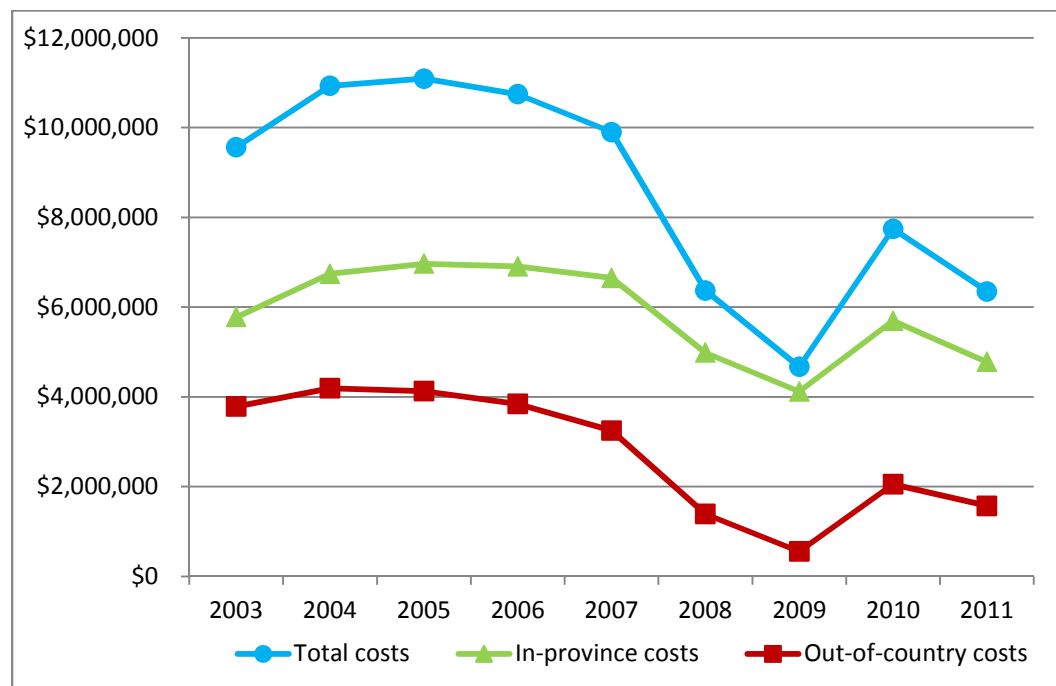

1  
2  
3  
4  
5  
6  
7  
8  
9  
10  
11  
12  
13  
14  
15  
16  
17  
18  
19  
20  
21  
22  
23  
24  
25  
26  
27  
28  
29  
30  
31  
32  
33  
34  
35  
36  
37  
38  
39  
40  
41  
42  
43  
44  
45  
46  
47  
48  
49  
50  
51  
52  
53  
54  
55  
56  
57  
58  
59  
60

## Appendix

**Table 1.** Summary of administrative health care databases

| Database                                                                                                      | Description                                                                                                                                                                                                                                                           |
|---------------------------------------------------------------------------------------------------------------|-----------------------------------------------------------------------------------------------------------------------------------------------------------------------------------------------------------------------------------------------------------------------|
| Canadian Institute for Health Information (CIHI)-Discharge Abstract Database (DAD)                            | The CIHI-DAD is a national database that contains demographic, clinical, and administrative data for acute inpatient hospital hospitalizations.                                                                                                                       |
| CIHI-National Ambulatory Care Reporting System (NACRS)                                                        | The CIHI-NACRS contains data for all ambulatory care including emergency department visits, and day surgery outpatient clinics.                                                                                                                                       |
| National Rehabilitation Reporting System (NRS)                                                                | The NRS contains national data on rehabilitation facilities and clients, collected from participating adult inpatient rehabilitation facilities and programs.                                                                                                         |
| Ontario Drug Benefit (ODB)                                                                                    | The ODB program includes data on all drugs dispensed in community pharmacies and long-term care/nursing facilities. The ODB covers all seniors in Ontario (aged 65 and over) and those on social assistance for all prescriptions listed in the provincial formulary. |
| Ontario Health Insurance Plan (OHIP)                                                                          | The OHIP data cover all services and procedures provided by health care providers who can claim under OHIP (physicians, laboratory services).                                                                                                                         |
| Home Care Database (HCD)                                                                                      | The HCD provides data on government-funded services coordinated by Ontario's Community Care Access Centres (CCAC), for individuals requiring home care.                                                                                                               |
| Continuing Care Reporting System (CCRS)                                                                       | The CCRS contains clinical and demographic information on individuals receiving facility-based continuing care. These services include medical long-term care, rehabilitation, geriatric assessment, respite care, and palliative care, and nursing home care.        |
| Client Profile Database (CPRO) (for 2003-2010)<br>Continuing Care Reporting System (CCRS) (from 2010 onwards) | The CPRO provides the date of admission to LTC facilities from 2003 through 2010, while the CCRS provides admission and discharge dates from 2010 onwards.                                                                                                            |
| Ontario Mental Health Reporting System (OMHRS)                                                                | The OMHRS collects, analyzes and reports on information about individuals admitted to designated adult mental health beds in Ontario. Some mental health patients are recorded in the CIHI-DAD.                                                                       |
| Assistive Devices Program (ADP)                                                                               | The ADP is a program operated by the Ministry of Health that provides consumer support and funding to Ontario residents who have long-term physical disabilities.                                                                                                     |

## STROBE Statement—checklist of items that should be included in reports of observational studies

|                              | Item No | Recommendation                                                                                                                                                                                                                                                                                                                                                                                                                                                                                                                                                                                                                                                                                   |
|------------------------------|---------|--------------------------------------------------------------------------------------------------------------------------------------------------------------------------------------------------------------------------------------------------------------------------------------------------------------------------------------------------------------------------------------------------------------------------------------------------------------------------------------------------------------------------------------------------------------------------------------------------------------------------------------------------------------------------------------------------|
| <b>Title and abstract</b>    | 1       | (a) Indicate the study's design with a commonly used term in the title or the abstract<br>(b) Provide in the abstract an informative and balanced summary of what was done and what was found                                                                                                                                                                                                                                                                                                                                                                                                                                                                                                    |
| <b>Introduction</b>          |         |                                                                                                                                                                                                                                                                                                                                                                                                                                                                                                                                                                                                                                                                                                  |
| Background/rationale         | 2       | Explain the scientific background and rationale for the investigation being reported                                                                                                                                                                                                                                                                                                                                                                                                                                                                                                                                                                                                             |
| Objectives                   | 3       | State specific objectives, including any prespecified hypotheses                                                                                                                                                                                                                                                                                                                                                                                                                                                                                                                                                                                                                                 |
| <b>Methods</b>               |         |                                                                                                                                                                                                                                                                                                                                                                                                                                                                                                                                                                                                                                                                                                  |
| Study design                 | 4       | Present key elements of study design early in the paper                                                                                                                                                                                                                                                                                                                                                                                                                                                                                                                                                                                                                                          |
| Setting                      | 5       | Describe the setting, locations, and relevant dates, including periods of recruitment, exposure, follow-up, and data collection                                                                                                                                                                                                                                                                                                                                                                                                                                                                                                                                                                  |
| Participants                 | 6       | (a) <i>Cohort study</i> —Give the eligibility criteria, and the sources and methods of selection of participants. Describe methods of follow-up<br><i>Case-control study</i> —Give the eligibility criteria, and the sources and methods of case ascertainment and control selection. Give the rationale for the choice of cases and controls<br><i>Cross-sectional study</i> —Give the eligibility criteria, and the sources and methods of selection of participants<br>(b) <i>Cohort study</i> —For matched studies, give matching criteria and number of exposed and unexposed<br><i>Case-control study</i> —For matched studies, give matching criteria and the number of controls per case |
| Variables                    | 7       | Clearly define all outcomes, exposures, predictors, potential confounders, and effect modifiers. Give diagnostic criteria, if applicable                                                                                                                                                                                                                                                                                                                                                                                                                                                                                                                                                         |
| Data sources/<br>measurement | 8*      | For each variable of interest, give sources of data and details of methods of assessment (measurement). Describe comparability of assessment methods if there is more than one group                                                                                                                                                                                                                                                                                                                                                                                                                                                                                                             |
| Bias                         | 9       | Describe any efforts to address potential sources of bias                                                                                                                                                                                                                                                                                                                                                                                                                                                                                                                                                                                                                                        |
| Study size                   | 10      | Explain how the study size was arrived at                                                                                                                                                                                                                                                                                                                                                                                                                                                                                                                                                                                                                                                        |
| Quantitative variables       | 11      | Explain how quantitative variables were handled in the analyses. If applicable, describe which groupings were chosen and why                                                                                                                                                                                                                                                                                                                                                                                                                                                                                                                                                                     |
| Statistical methods          | 12      | (a) Describe all statistical methods, including those used to control for confounding<br>(b) Describe any methods used to examine subgroups and interactions<br>(c) Explain how missing data were addressed<br>(d) <i>Cohort study</i> —If applicable, explain how loss to follow-up was addressed<br><i>Case-control study</i> —If applicable, explain how matching of cases and controls was addressed<br><i>Cross-sectional study</i> —If applicable, describe analytical methods taking account of sampling strategy<br>(e) Describe any sensitivity analyses                                                                                                                                |

Continued on next page

**Results**

|                  |     |                                                                                                                                                                                                                                                                                                                                                                                                               |
|------------------|-----|---------------------------------------------------------------------------------------------------------------------------------------------------------------------------------------------------------------------------------------------------------------------------------------------------------------------------------------------------------------------------------------------------------------|
| Participants     | 13* | (a) Report numbers of individuals at each stage of study—eg numbers potentially eligible, examined for eligibility, confirmed eligible, included in the study, completing follow-up, and analysed<br>(b) Give reasons for non-participation at each stage<br>(c) Consider use of a flow diagram                                                                                                               |
| Descriptive data | 14* | (a) Give characteristics of study participants (eg demographic, clinical, social) and information on exposures and potential confounders<br>(b) Indicate number of participants with missing data for each variable of interest<br>(c) <i>Cohort study</i> —Summarise follow-up time (eg, average and total amount)                                                                                           |
| Outcome data     | 15* | <i>Cohort study</i> —Report numbers of outcome events or summary measures over time<br><i>Case-control study</i> —Report numbers in each exposure category, or summary measures of exposure<br><i>Cross-sectional study</i> —Report numbers of outcome events or summary measures                                                                                                                             |
| Main results     | 16  | (a) Give unadjusted estimates and, if applicable, confounder-adjusted estimates and their precision (eg, 95% confidence interval). Make clear which confounders were adjusted for and why they were included<br>(b) Report category boundaries when continuous variables were categorized<br>(c) If relevant, consider translating estimates of relative risk into absolute risk for a meaningful time period |
| Other analyses   | 17  | Report other analyses done—eg analyses of subgroups and interactions, and sensitivity analyses                                                                                                                                                                                                                                                                                                                |

**Discussion**

|                  |    |                                                                                                                                                                            |
|------------------|----|----------------------------------------------------------------------------------------------------------------------------------------------------------------------------|
| Key results      | 18 | Summarise key results with reference to study objectives                                                                                                                   |
| Limitations      | 19 | Discuss limitations of the study, taking into account sources of potential bias or imprecision. Discuss both direction and magnitude of any potential bias                 |
| Interpretation   | 20 | Give a cautious overall interpretation of results considering objectives, limitations, multiplicity of analyses, results from similar studies, and other relevant evidence |
| Generalisability | 21 | Discuss the generalisability (external validity) of the study results                                                                                                      |

**Other information**

|         |    |                                                                                                                                                               |
|---------|----|---------------------------------------------------------------------------------------------------------------------------------------------------------------|
| Funding | 22 | Give the source of funding and the role of the funders for the present study and, if applicable, for the original study on which the present article is based |
|---------|----|---------------------------------------------------------------------------------------------------------------------------------------------------------------|

\*Give information separately for cases and controls in case-control studies and, if applicable, for exposed and unexposed groups in cohort and cross-sectional studies.

**Note:** An Explanation and Elaboration article discusses each checklist item and gives methodological background and published examples of transparent reporting. The STROBE checklist is best used in conjunction with this article (freely available on the Web sites of PLoS Medicine at <http://www.plosmedicine.org/>, Annals of Internal Medicine at <http://www.annals.org/>, and Epidemiology at <http://www.epidem.com/>). Information on the STROBE Initiative is available at [www.strobe-statement.org](http://www.strobe-statement.org).
